# Supplementary material for: High hedgehog signaling is transduced by a multikinase-dependent switch controlling the apico-basal distribution of the GPCR smoothened
Source: eLife. 2022 Sep 9;11:e79843. doi: 10.7554/eLife.79843 (PMC9462849; doi:10.7554/eLife.79843)
Supplement: Figure 1—figure supplement 2—source data 1. [file elife-79843-fig1-figsupp2-data1.xlsx]

## Sheet: Feuil1
Figure 1-figure supplement 2 source data 1
E: Mean intensity of Intra SNAP-SMO along the apico-basal axis
Summary Statistics (arithmetic from GraphPad Prism 9)
	Mean Column			Mean Apical			Mean Lateral			Mean Basal			Paired t test
	FA	P		FA	P		FA	P		FA	P		*	0.0278
Number of values	11	11		11	11		11	11		11	11
Mean	43.15	44.73		53.97	54.08		43	44.7		27.89	30.67
Std. Deviation	9.307	11.03		13.16	19.76		9.462	10.31		8.713	9.563
Lower 95% CI of mean	36.9	37.32		45.13	40.8		36.65	37.77		22.04	24.25
Upper 95% CI of mean	49.4	52.14		62.81	67.36		49.36	51.63		33.75	37.09
Source Data
	Far Anterior (FA)					Posterior (P)
Discs	Mean Column	Mean Apical	Mean Lateral	Mean Basal		Mean Column	Mean Apical	Mean Lateral	Mean Basal
1	38.2253	43.2348	37.8344	33.6015		40.1411	43.8357	40.13	34.0976
2	52.638	67.0867	51.495	39.3357		52.3868	66.0927	51.7701	36.2975
3	36.3867	55.3773	35.3871	15.3758		29.6679	26.7706	31.7475	18.381
4	51.7011	62.6296	51.4381	37.1425		50.5414	62.4561	49.659	39.5596
5	40.3368	51.7217	40.4384	22.4989		41.8002	46.4617	43.3712	22.8297
6	33.1918	33.1491	33.7971	28.7159		34.7473	34.9378	34.1842	37.9293
7	45.1583	70	43.7319	18.1264		52.7075	84.5175	50.4542	21.1857
8	41.7052	45.1963	41.9318	34.1007		50.9977	72.0849	48.4834	38.1154
9	55.776	65.9816	56.599	34.6116		60.0874	67.7698	60.7684	42.7303
10	52.7636	64.0047	53.8589	27.4215		53.155	65.1246	53.7444	30.9255
11	26.7796	35.2663	26.5247	15.8754		25.7896	24.8087	27.384	15.3105
