# Supplementary material for: High hedgehog signaling is transduced by a multikinase-dependent switch controlling the apico-basal distribution of the GPCR smoothened
Source: eLife. 2022 Sep 9;11:e79843. doi: 10.7554/eLife.79843 (PMC9462849; doi:10.7554/eLife.79843)
Supplement: Figure 1—figure supplement 3—source data 1. [file elife-79843-fig1-figsupp3-data1.xlsx]

## Sheet: Feuil1
Figure 1-figure supplement 3 source data 1
B: Relative intensity of endogenous SMO (immunolabeling)
Summary Statistics (arithmetic from GraphPad Prism 9)
	Relative intensity apical			Relative intensity lateral			Relative intensity basal			Wilcoxon test
	FA	P		FA	P		FA	P		**	0.0039
Number of values	10	10		10	10		10	10
Mean	0.153	0.1259		0.7507	0.7598		0.09726	0.1147
Std. Deviation	0.02371	0.02163		0.01881	0.01372		0.01719	0.01666
Lower 95% CI of mean	0.136	0.1105		0.7372	0.75		0.08497	0.1028
Upper 95% CI of mean	0.1699	0.1414		0.7641	0.7696		0.1096	0.1267
Source Data
	FA					P
Discs	I.D Column	I.D Apical	I.D Basal	I.D Lateral		I.D Column	I.D Apical	I.D Basal	I.D Lateral
1	15468420	1896288	1478390	12093742		20684760	2153631	15672165	2858964
2	1.59084e+07	1874769	1752454	12316671		25016375	2149709	19819891	3046775
3	36237257	5738750	3097518	27494012		52150392	7051068	5.82005e+06	39174709
4	32377570	5719055	2338651	24319864		50101183	6.44091e+06	5433457	38323560
5	19160007	3624015	1401525	14112316		27242888	4224534	2202379	20815975
6	20010970	2859730	2469605	14730980		35093606	3629660	4695248	26863932
7	22481365	2919761	2428956	17132648		35010377	4735454	3775532	26571403
8	21502861	3508618	1933438	16074212		35108555	4929191	3727824	26451540
9	17968264	2955068	1811317	13237997		31362286	4567692	3449699	23344895
10	18691033	3076456	2128246	13486331		30929360	3892883	3978671	23057806
