# Supplementary material for: High hedgehog signaling is transduced by a multikinase-dependent switch controlling the apico-basal distribution of the GPCR smoothened
Source: eLife. 2022 Sep 9;11:e79843. doi: 10.7554/eLife.79843 (PMC9462849; doi:10.7554/eLife.79843)
Supplement: Figure 1—source data 1. [file elife-79843-fig1-data1.xlsx]

## Sheet: Feuil1
Figure 1- Source Data 1
1D: Mean intensity of Surf SNAP-SMO along the apico-basal axis
Summary Statistics (arithmetic from GraphPad Prism 9)
	Mean Column					Mean Apical					Mean Lateral					Mean Basal					Paired t test
	CI-R	CI-F	CI-A	P		CI-R	CI-F	CI-A	P		CI-R	CI-F	CI-A	P		CI-R	CI-F	CI-A	P
Number of values	32	32	32	32		32	32	32	32		32	32	32	32		32	32	32	32		****	<0.0001
																					***	0,0004
Mean	49.03	58.74	65.41	85.13		77.38	91.75	87.94	103.4		45.83	55.05	62.86	84.11		30.33	36.84	50.33	68.47
Std. Deviation	19.96	23.13	23.93	29.73		31	38.41	34.88	42.88		19.42	22.39	23.62	29.15		13.84	14.75	20.33	26.9
Lower 95% CI of mean	41.83	50.4	56.78	74.41		66.21	77.9	75.36	87.9		38.83	46.98	54.35	73.6		25.34	31.52	43	58.77
Upper 95% CI of mean	56.22	67.07	74.03	95.84		88.56	105.6	100.5	118.8		52.83	63.12	71.38	94.62		35.32	42.16	57.66	78.17
Source Data
	CIR					CI-F					CiA					P
Discs	Mean Column	Mean Apical	Mean Basal	Mean Lateral		Mean Column	Mean Apical	Mean Basal	Mean Lateral		Mean Column	Mean Apical	Mean Basal	Mean Lateral		Mean Column	Mean Apical	Mean Basal	Mean Lateral
1	93.5048	151.4	53.0328	87.3834		103.735	165.431	56.2617	97.5156		99.8164	132.371	70.9831	97.0999		123.002	140.933	111.311	120.987
2	67.9937	113.437	38.2551	62.8191		92.5592	152.448	53.2007	85.7833		83.0679	129.475	56.0636	77.3012		117.77	145.334	90.7528	115.759
3	58.8217	100.262	31.9772	54.0855		72.1499	131.067	22.9323	66.8677		71.9735	96.5832	42.9557	70.918		77.6395	99.1174	57.07	75.9445
4	58.3884	94.418	27.7199	55.1528		71.3362	111.886	37.1872	67.879		70.9812	109.548	42.8501	67.0467		94.5834	115.573	65.3097	94.2101
5	63.5009	98.8652	32.6951	60.395		64.1318	103.388	36.2924	59.9752		73.6349	93.8772	50.1795	72.7453		99.9834	143.767	73.6241	94.7872
6	63.6071	106.183	30.6955	59.3903		73.3153	127.659	35.3498	67.5502		81.9856	115.024	67.8273	77.062		100.275	137.613	61.6801	97.9954
7	58.0522	58.0842	58.4151	57.9972		72.5667	72.6636	71.7399	72.6577		66.8935	60.2029	70.4435	67.5814		107.615	90.9373	121.586	109.036
8	78.0869	124.057	45.718	73.1933		82.702	131.895	55.7323	76.4505		112.209	146.182	91.4121	108.139		112.144	105.866	71.8697	118.725
9	74.0275	125.428	37.7839	68.529		79.9397	129.838	40.4156	75.2249		98.8269	143.954	68.2352	93.769		115.386	135.533	66.8745	117.785
10	52.1193	75.7936	30.3698	50.3375		78.2948	147.945	33.0812	70.5276		95.1651	147.116	58.5892	89.5859		132.353	230.634	93.4088	117.847
11	55.1019	85.5074	27.1887	52.6962		72.2056	125.096	38.1695	66.1455		68.4806	105.658	37.7812	64.9978		86.1567	113.937	47.9144	85.7474
12	37.0225	57.108	19.7311	35.3409		44.4715	63.4254	19.7211	43.9718		53.6021	77.9692	22.1981	52.9527		72.6848	90.5266	40.036	73.4302
13	42.684	66.5452	24.4552	40.3791		60.7672	95.8117	33.6653	57.2856		66.8725	80.3787	59.0682	65.0473		86.6281	108.967	37.3113	88.7806
14	55.1453	77.4776	36.4127	53.1582		59.5687	94.0862	43.8893	54.7404		69.3089	98.5451	44.6916	66.744		100.735	139.071	83.0038	95.2604
15	63.7795	106.876	34.4687	58.985		68.0223	109.657	41.4255	63.2939		84.7787	114.051	59.9392	82.2177		99.7981	130.124	79.8394	96.3842
16	64.8428	77.4185	64.9181	62.3101		69.5607	83.9616	61.5804	67.7185		72.3669	57.1779	84.6036	73.8306		98.4735	78.3556	118.513	99.8478
17	63.8354	109.412	32.4359	58.8745		65.3498	98.7076	46.0139	61.2366		88.0387	122.367	67.9019	83.7833		102.785	128.059	87.3718	99.8368
18	73.4287	94.5584	62.767	70.6218		88.4348	112.97	68.2917	86.1971		97.2186	90.197	97.6418	98.5691		142.396	157.521	139.667	139.755
19	53.8879	83.3042	33.1527	50.7694		73.0882	123.719	39.8248	67.3276		68.4563	98.4106	47.7746	65.1594		94.8208	114.933	77.1744	93.0202
20	38.9056	55.37	18.6202	38.3674		48.7496	66.439	24.3448	48.4406		57.9241	90.9288	29.908	54.9406		81.7355	106.733	47.0596	81.1863
21	63.6732	99.4329	19.5155	62.3676		90.7483	125.874	42.8634	90.1101		91.2485	131.979	51.3425	88.3167		119.172	147.425	79.4431	118.524
22	29.589	43.4735	28.9189	26.8813		32.2357	46.8122	32.1437	29.3221		42.1526	55.8725	48.9777	38.5074		67.2719	72.2173	83.4632	64.12
23	26.7875	48.8509	18.8766	23.4757		30.3864	49.9637	20.8068	27.7612		33.1781	46.2863	26.4636	31.3598		48.0945	60.7823	46.3788	45.7881
24	29.9915	57.6719	18.6267	25.9533		31.3243	46.2618	23.522	29.363		40.8989	55.1186	33.8164	39.0067		51.6744	59.9826	47.2207	50.6112
25	26.8838	48.7019	19.2616	23.4993		32.896	52.9422	27.3868	29.6553		42.0808	55.4612	32.177	40.7066		55.2268	66.22	55.87	52.9249
26	27.12	45.6514	18.6674	24.5097		41.3286	53.9411	31.4245	40.1302		56.6431	67.2891	52.2743	55.1022		57.2753	75.26	45.883	55.2148
27	19.3847	23.6902	20.2319	18.4161		30.4957	25.0482	41.1612	30.1619		40.2155	31.5979	60.4507	39.2372		37.9245	27.4963	62.2065	36.8094
28	33.7263	67.898	17.1433	29.0392		39.8135	92.8093	18.1118	32.1544		39.0863	77.4573	21.5598	33.7328		66.9204	83.983	44.3515	66.3814
29	18.6818	28.9132	15.6372	17.0416		27.7175	49.1576	22.7731	24.1248		34.364	43.7211	34.5423	32.3836		46.3755	57.4708	44.8646	44.2454
30	25.4819	41.8725	21.8045	22.7173		30.5294	46.3391	23.9852	28.2632		32.4167	35.0393	29.2188	32.3142		40.0892	35.748	42.0153	40.6942
31	30.624	68.8339	16.4743	24.8841		30.035	61.8887	20.0735	25.0461		34.406	67.9215	23.0802	29.1922		54.4855	66.039	52.1808	52.481
32	20.1795	39.7501	14.521	16.9866		21.0746	36.7379	15.5271	18.6585		24.7718	36.2142	25.5546	22.3265		32.535	41.2092	32.2315	30.8404

## Sheet: Feuil2
Figure 1- Source Data 1
Figure 1E: Relative intensity of Surf SNAP SMO along the Apico basal axis in 4 different regions of the wing discs
Summary Statisctics
Source Data	ID Column	ID Apical	ID Medial	ID Basal		ID apical/ ID column	ID medial/ ID column	ID basal/ ID column
30 (20190716)	93.5048	151.4	53.0328	87.3834
43 (20190716)	67.9937	113.437	38.2551	62.8191
54 (20190716)	58.8217	100.262	31.9772	54.0855
65 (20190716)	58.3884	94.418	27.7199	55.1528
76 (20190716)	63.5009	98.8652	32.6951	60.395
101 (20190716)	63.6071	106.183	30.6955	59.3903
126 (20190716)	58.0522	58.0842	58.4151	57.9972
138 (20190716)	78.0869	124.057	45.718	73.1933
146 (20190716)	74.0275	125.428	37.7839	68.529
155 (20190716)	52.1193	75.7936	30.3698	50.3375
15 (20190716)	55.1019	85.5074	27.1887	52.6962
28 (20190716)	37.0225	57.108	19.7311	35.3409
88 (20181027)	42.684	66.5452	24.4552	40.3791
14 (20190721)	55.1453	77.4776	36.4127	53.1582
28 (20190721)	63.7795	106.876	34.4687	58.985
45 (20190721)	64.8428	77.4185	64.9181	62.3101
56 (20190721)	63.8354	109.412	32.4359	58.8745
68 (20190721)	73.4287	94.5584	62.767	70.6218
81 (20190721)	53.8879	83.3042	33.1527	50.7694
35 (20190721)	38.9056	55.37	18.6202	38.3674
43 (20190721)	63.6732	99.4329	19.5155	62.3676
15 (20191017)	1251437	277535	121980	851922		0.221773	0.0974719	0.680755
18 (20191017)	986370	267312	68862	647647		0.271006	0.0698136	0.656596
25 (20191017)	1456507	420774	91308	946776		0.288893	0.0626897	0.650032
28 (20191017)	1014435	277601	72462	664372		0.273651	0.0714309	0.654918
34 (20191017)	1434540	364298	97892	972350		0.253948	0.0682393	0.677813
37 (20191017)	742510	135034	78419	529057		0.181862	0.105613	0.712525
42	1562496	394953	89898	1077645		0.252771	0.0575349	0.689695
58 (20191017)	1630195	495384	82082	1052729		0.30388	0.050351	0.645769
60 (20191017)	822073	191174	69523	563395		0.232551	0.0845703	0.685335
71 (20191017)	1130019	276861	96943	756215		0.245006	0.0857888	0.669206
81 (20191017)	1420893	478671	77001	865221		0.33688	0.054192	0.608928
89 (20191017)	989199	294548	71182	625481		0.297764	0.0719592	0.632311
