# Supplementary material for: High hedgehog signaling is transduced by a multikinase-dependent switch controlling the apico-basal distribution of the GPCR smoothened
Source: eLife. 2022 Sep 9;11:e79843. doi: 10.7554/eLife.79843 (PMC9462849; doi:10.7554/eLife.79843)
Supplement: Figure 1—source data 2. [file elife-79843-fig1-data2.xlsx]

## Sheet: Feuil1
Figure 1- Source Data 2
1E: Relative intensity of Surf SNAP-SMO along the apico-basal axis
Summary Statistics (arithmetic from GraphPad Prism 9)
	Relative intensity apical					Relative intensity lateral					Relative intensity basal					Wilcoxon test
	CI-R	CI-F	CI-A	P		CI-R	CI-F	CI-A	P		CI-R	CI-F	CI-A	P
Number of values	33	33	33	33		33	33	33	33		33	33	33	33		****	<0.0001
																**	0.0016
Mean	0.242	0.2355	0.2029	0.1801		0.6943	0.6979	0.7184	0.7335		0.06402	0.06661	0.07939	0.08639		***	0.0004
Std. Deviation	0.03472	0.04146	0.0329	0.03388		0.03247	0.03216	0.02438	0.0278		0.01414	0.01918	0.02072	0.01981
Lower 95% CI of mean	0.2297	0.2208	0.1913	0.1681		0.6828	0.6865	0.7097	0.7236		0.05901	0.05981	0.07205	0.07936
Upper 95% CI of mean	0.2543	0.2502	0.2146	0.1922		0.7058	0.7093	0.727	0.7433		0.06903	0.07341	0.08674	0.09341
Source Data
	CI-R					CI-F					CI-A					P
Discs	I.D Column	I.D Apical	I.D Basal	I.D Lateral		I.D Column	I.D Apical	I.D Basal	I.D Lateral		I.D Column	I.D Apical	I.D Basal	I.D Lateral		I.D Column	I.D Apical	I.D Basal	I.D Lateral
1	4562286	1104611	259967	3197708		5025953	1206988	275795	3546251		4984033	995962	356051	3641830		5987506	1028248	545648	4413610
2	3038502	762976	170082	2105444		4284008	1060124	248660	2982686		3768959	885607	255650	2634888		5142057	944381	393141	3787388
3	2903557	742938	156752	2003867		3882240	1060858	122871	2698511		4406071	891849	264435	3258117		4292686	824855	318793	3151391
4	2962043	721165	142203	2099999		3602619	841829	186531	2569086		3617058	836724	219821	2560513		4507088	830042	312703	3372343
5	2968030	698779	152817	2120589		2880545	695385	161356	2023804		3433302	652822	234539	2545941		4650430	999754	344119	3306557
6	3023752	762607	146970	2119164		3401685	887740	165225	2348720		3785277	799876	317025	2670659		4652553	956961	288293	3407299
7	3229559	483377	326307	2419875		3962575	596423	392561	2973591		3622282	487282	385467	2742722		5434791	684212	609875	4126783
8	3729901	890977	218898	2620026		3903203	932233	260493	2710477		5257456	1033212	427260	3796984		5164905	736192	327726	4100987
9	3426287	872225	176602	2382755		3781948	917695	193510	2667025		4698035	1033881	326710	3345865		5945622	1050652	343066	4551904
10	2709370	587552	159259	1962559		4070075	1146866	173478	2749731		5109795	1190760	313921	3605114		6.92551e+06	1814169	489836	4621505
11	2424703	565375	120881	1742136		3284342	855655	174053	2254634		3044648	710655	167975	2171055		3614444	714386	202103	2697955
12	1726213	397129	92223	1236861		2205340	469982	98921	1634167		2621466	568863	108815	1943788		3264711	608882	178000	2477829
13	1892865	439997	108728	1344140		2660146	633507	145838	1880801		2935036	531464	262617	2143047		4226758	795020	182900	3248838
14	2847815	600606	186797	2060412		3076247	729356	225152	2121739		3476534	741453	224173	2510908		4995464	1030518	416347	3540258
15	3373681	852874	180754	2340053		3636880	875066	221958	2539856		4310487	871125	307488	3139893		5222034	1023554	418678	3779802
16	3089891	556020	310828	2230451		3314706	603012	294847	2424051		3448427	410652	405082	2642840		4411810	527020	526907	3357883
17	3151042	810740	159001	2181301		3225799	731423	225560	2268816		4385910	920689	340596	3132825		4874455	905122	418336	3550997
18	3465539	668339	293373	2503827		4294749	824230	334766	3144469		4721323	658077	478640	3595801		6.63934e+06	1095399	652804	4891140
19	2703018	626781	166294	1909943		3591115	916756	195221	2479138		3308906	718004	228745	2362157		4485973	812348	369511	3297937
20	1964810	416604	93399	1452128		2406377	492313	119338	1794726		2707372	642685	139790	1929075		3960083	778724	230686	2952420
21	3150293	736798	95665	2317830		4148470	860975	195457	3092038		4202540	917784	234122	3050634		4958756	924355	335091	3702215
22	1251437	277535	121980	851922		1367050	298849	135582	932619		1777997	356690	206588	1220377		2783845	444570	342533	1988233
23	986370	267312	68862	647647		1132743	279097	78275	775371		1229247	258555	99556	872304		1792868	339530	174477	1278861
24	1456507	420774	91308	946776		1542657	342800	115305	1084552		1990876	402145	165768	1422963		2515407	437633	231476	1846298
25	1014435	277601	72462	664372		1233797	295735	103029	835033		1592676	316129	121050	1155497		2083929	377454	210183	1496292
26	1434540	364298	97892	972350		2171985	424301	164790	1582894		2879962	513954	268167	2104353		2925162	574836	235380	2114946
27	742510	135034	78419	529057		1178538	145630	159541	873367		1554168	183710	234307	1136151		1444014	156729	234021	1053264
28	1562496	394953	89898	1077645		2256200	343886	190494	1721820		2988599	460948	246411	2275172		2771991	278682	245454	2247855
29	1630195	495384	82082	1052729		2006125	698297	90849	1216979		1956115	582789	108144	1265182		3394871	641462	227523	2527540
30	822073	191174	69523	563395		1210200	319426	98653	789314		1508237	289084	153575	1066910		2035421	379997	199468	1457709
31	1130019	276861	96943	756215		1353856	306394	106638	940824		1444940	235674	129907	1079359		1777796	236366	186800	1354630
32	1420893	478671	77001	865221		1424380	437429	96112	890839		2037321	500769	162338	1371178		2521807	459235	243893	1824766
33	989199	294548	71182	625481		1049895	276416	77884	697679		1228435	268347	128182	829741		1605995	305360	157999	1142636
