# Supplementary material for: High hedgehog signaling is transduced by a multikinase-dependent switch controlling the apico-basal distribution of the GPCR smoothened
Source: eLife. 2022 Sep 9;11:e79843. doi: 10.7554/eLife.79843 (PMC9462849; doi:10.7554/eLife.79843)
Supplement: Figure 2—figure supplement 1—source data 2. [file elife-79843-fig2-figsupp1-data2.xlsx]

## Sheet: Feuil1
Figure 2-figure supplement 1 source data2
F: Relative intensity of Surf SNAP-SMO in control and shibirets flies at 18°C
Summary Statistics (arithmetic from GraphPad Prism 9)
	FA							P							Mann-Whitney test
	Relative intensity apical		Relative intensity lateral		Relative intensity basal			Relative intensity apical		Relative intensity lateral		Relative intensity basal
	ctr	shits	ctr	shits	ctr	shits		ctr	shits	ctr	shits	ctr	shits
Number of values	8	7	8	7	8	7		8	7	8	7	8	7
Mean	0.1968	0.1919	0.7175	0.7276	0.08549	0.08111		0.1589	0.157	0.7382	0.7469	0.1026	0.09663
Std. Deviation	0.01778	0.02032	0.01844	0.01785	0.01817	0.014		0.01004	0.008555	0.005662	0.01297	0.009866	0.01647
Lower 95% CI of mean	0.1819	0.1731	0.7021	0.7111	0.0703	0.06816		0.1506	0.1491	0.7335	0.7349	0.09436	0.0814
Upper 95% CI of mean	0.2117	0.2107	0.733	0.7441	0.1007	0.09405		0.1673	0.1649	0.743	0.7589	0.1109	0.1119
Source Data											Source Data
	ctr											shits
	FA					P						FA					P
Discs	I.D Column	I.D Apical	I.D Basal	I.D Lateral		I.D Column	I.D Apical	I.D Basal	I.D Lateral		Discs	I.D Column	I.D Apical	I.D Basal	I.D Lateral		I.D Column	I.D Apical	I.D Basal	I.D Lateral
1	1449436	260153	155481	1033802		2343482	378141	255611	1711306		1	1190592	179162	121279	893060		1796469	254677	191541	1350251
2	1450515	290612	110121	1049782		2235042	336647	243173	1655222		2	1333171	259781	129480	946629		2349273	375245	256160	1717868
3	1179293	232001	89394	856254		1852969	296374	185296	1366869		3	1947561	375966	140761	1430834		2975139	454465	322027	2204841
4	1170701	206938	139677	824086		2422231	352958	286991	1782282		4	1591902	300241	117474	1174187		2530464	414159	186979	1929326
5	1454168	277227	109147	1070413		2137484	313948	224581	1598955		5	1183223	230354	73675	879194		2224837	374508	166732	1687486
6	1276953	237020	88111	951822		2353108	393647	230793	1728668		6	875698	182081	70481	623136		2000960	316630	223653	1460677
7	1306771	294980	97193	912351		2043854	346481	177324	1520049		7	1065012	227622	85133	752257		2496327	385240	229446	1881641
8	1267937	277862	110531	879544		1894148	322468	179121	1392559
