# Supplementary material for: High hedgehog signaling is transduced by a multikinase-dependent switch controlling the apico-basal distribution of the GPCR smoothened
Source: eLife. 2022 Sep 9;11:e79843. doi: 10.7554/eLife.79843 (PMC9462849; doi:10.7554/eLife.79843)
Supplement: Figure 2—source data 1. [file elife-79843-fig2-data1.xlsx]

## Sheet: Feuil1
Figure 2- Source Data 1
2C: Mean intensity of Surf SNAP-SMO for control and shits flies
Summary Statistics (arithmetic from GraphPad Prism 9)
	FA									P									Mann-Whitney test
	Mean Column		Mean Apical		Mean Lateral		Mean Basal			Mean Column		Mean Apical		Mean Lateral		Mean Basal
	ctr	shits	ctr	shits	ctr	shits	ctr	shits		ctr	shits	ctr	shits	ctr	shits	ctr	shits		NO HH	**	0.0039
Number of values	17	10	17	10	17	10	17	10		17	10	17	10	17	10	17	10			****	<0.0001
																				*	0.0459
Mean	35.43	45.33	44.82	72.7	35.29	41.72	22.17	31		55.69	69.11	61.93	95.01	56.1	66.16	43.16	52.27			**	0.032
Std. Deviation	4.251	8.542	7.793	14.91	4.451	8.535	3.311	10.62		5.903	11.29	10.75	24.15	5.696	11.29	5.943	9.698		HH	**	0.0014
																				****	<0.0001
Lower 95% CI of mean	33.24	39.21	40.82	62.03	33	35.61	20.47	23.41		52.66	61.03	56.41	77.73	53.17	58.09	40.11	45.33			*	0.0151
Upper 95% CI of mean	37.61	51.44	48.83	83.36	37.58	47.82	23.87	38.6		58.73	77.18	67.46	112.3	59.03	74.24	46.22	59.21			**	0.0093
Source Data											Source Data
	Ctr											shits
	FA					P						FA					P
Discs	Mean Column	Mean Apical	Mean Basal	Mean Lateral		Mean Column	Mean Apical	Mean Basal	Mean Lateral		Discs	Mean Column	Mean Apical	Mean Basal	Mean Lateral		Mean Column	Mean Apical	Mean Basal	Mean Lateral
1	35.507	41.4373	21.1187	36.2682		56.8859	56.0819	51.2321	57.8004		1	43.5559	66.3946	26.6514	41.1735		74.9351	97.0308	49.1965	73.8708
2	41.9304	43.0589	23.9605	44.0541		49.0857	46.2969	38.9284	50.9978		2	59.2311	82.8625	57.3401	54.77		64.4325	70.8418	62.4829	63.4052
3	37.3381	52.799	26.6757	35.6608		45.1995	46.7405	40.2024	45.5575		3	46.917	65.5654	30.7781	45.2988		66.6029	88.0335	49.0879	64.5878
4	28.0267	28.1798	28.3311	27.9558		50.1575	50.6597	48.6894	50.2508		4	41.7479	68.6047	29.5077	37.9711		60.9837	87.4871	50.9155	56.9752
5	44.8428	54.08	28.5812	45.1799		58.236	57.192	53.2239	59.1186		5	47.2534	103.957	25.4708	38.6729		77.1935	139.986	47.8085	68.6075
6	34.3572	38.4129	25.6421	34.707		63.5727	74.1825	46.6962	63.7194		6	53.0237	72.1632	37.0309	51.2875		84.2087	91.0053	73.2656	84.2714
7	37.1498	51.0434	20.3772	36.5819		57.915	57.629	45.3828	59.6139		7	34.0207	58.6668	21.8649	30.6466		63.7282	96.1903	42.9767	60.0677
8	32.0597	38.7345	21.5447	32.0631		54.3005	65.4205	34.9239	54.6423		8	54.8801	89.0012	32.632	51.0559		87.4943	133.043	51.8753	83.1463
9	31.5962	40.2086	19.4967	31.467		46.9761	49.4487	38.0391	47.6477		9	36.7576	56.6596	29.7858	33.691		56.55	65.4433	55.5622	54.9142
10	32.5555	41.678	20.7764	32.2413		67.5845	83.6862	42.4948	67.6643		10	35.8687	63.0974	18.9637	32.6064		54.9378	81.0167	39.5155	51.7944
11	33.4233	46.3494	18.2085	32.8041		51.9302	58.25	35.9368	52.7565
12	29.2299	32.1737	21.6002	29.6637		56.9623	61.3912	49.8623	57.0214
13	37.4732	51.7103	21.2677	36.7484		59.4675	73.7687	37.154	59.5603
14	37.0667	48.6036	22.2761	36.7636		62.5359	75.5272	49.9603	61.5589
15	34.5398	46.1626	19.1708	34.2		56.2757	66.4695	42.8394	56.0432
16	36.5392	53.372	18.5834	35.5474		54.472	64.6754	41.9922	54.0941
17	38.5978	53.9738	19.2846	38.0796		55.1978	65.3969	36.1852	55.6945
