# Supplementary material for: High hedgehog signaling is transduced by a multikinase-dependent switch controlling the apico-basal distribution of the GPCR smoothened
Source: eLife. 2022 Sep 9;11:e79843. doi: 10.7554/eLife.79843 (PMC9462849; doi:10.7554/eLife.79843)
Supplement: Figure 2—source data 2. [file elife-79843-fig2-data2.xlsx]

## Sheet: Feuil1
Figure 2- Source Data 2
2C' : Relative intensity of Surf SNAP-SMO for control and shits flies
Summary Statistics (arithmetic from GraphPad Prism 9)
	FA							P							Mann-Whitney test
	Relative intensity apical		Relative intensity lateral		Relative intensity basal			Relative intensity apical		Relative intensity lateral		Relative intensity basal			****	<0.0001
	ctr	shits	ctr	shits	ctr	shits		ctr	shits	ctr	shits	ctr	shits		**	0.0022
Number of values	17	10	17	10	17	10		17	10	17	10	17	10
Mean	0.1894	0.2436	0.7477	0.6897	0.0635	0.06756		0.1662	0.2057	0.7562	0.7183	0.0781	0.0768
Std. Deviation	0.02129	0.03758	0.016	0.03171	0.01205	0.01285		0.01523	0.03361	0.009902	0.0243	0.01066	0.01407
Lower 95% CI of mean	0.1784	0.2167	0.7395	0.667	0.0573	0.05837		0.1583	0.1817	0.7512	0.7009	0.07262	0.06674
Upper 95% CI of mean	0.2003	0.2705	0.7559	0.7124	0.06969	0.07676		0.174	0.2298	0.7613	0.7357	0.08358	0.08686
Source Data											Source Data
	ctr											shits
	FA					P						FA					P
Discs	I.D Column	I.D Apical	I.D Basal	I.D Lateral		I.D Column	I.D Apical	I.D Basal	I.D Lateral		Discs	I.D Column	I.D Apical	I.D Basal	I.D Lateral		I.D Column	I.D Apical	I.D Basal	I.D Lateral
1	1521973	264536	91486	1165951		2405934	358027	216097	1831810		1	1936497	446570	118492	1375276		3391414	663691	224336	2509540
2	1806865	279797	103797	1426295		2126392	300837	168638	1656917		2	2660426	557333	254934	1848159		3026268	500710	292045	2233513
3	1591946	337069	112518	1142359		1958041	303720	174157	1480164		3	2128716	448467	140348	1544054		3014313	602149	223841	2194178
4	1255651	189537	125960	940154		2252874	340737	216473	1695664		4	1956058	484898	137919	1333241		2850377	618359	237979	2000513
5	1988597	357577	127072	1503948		2496226	365114	230566	1900546		5	2316362	770324	124858	1424012		3713623	1005377	228907	2479339
6	1570607	262744	116928	1190935		2949646	515865	218258	2215523		6	2647581	542956	185747	1923590		4089512	663975	359148	3074222
7	1719441	354956	95243	1271954		2548492	381043	201772	1970836		7	1745260	454785	112167	1180876		3167545	712770	215571	2239204
8	1553294	282607	105612	1166007		2668001	484766	171197	2012038		8	2802838	679791	167402	1955645		4598174	1046518	272034	3279622
9	1433585	275027	88905	1072585		2088557	332592	169122	1591527		9	1894048	439225	152801	1302022		2765632	477474	272366	2015792
10	1577312	304083	101846	1172486		3351514	620115	213154	2514675		10	1819620	481938	97284	1241523		2674264	591098	193705	1889461
11	1638408	343449	89258	1207912		2592978	438273	180259	1978686
12	1429519	234739	105884	1088896		2766317	447910	244425	2080139
13	1952281	406753	111528	1436935		3077801	571855	190600	2315346
14	1842364	360153	111737	1370474		2979960	542436	239210	2203561
15	1752204	352590	98346	1302201		2880529	507694	219766	2153069
16	1720337	377233	86859	1256245		2726105	486618	210633	2028854
17	2081271	436864	103327	1541080		2888282	514412	189755	2184115
