# Supplementary material for: High hedgehog signaling is transduced by a multikinase-dependent switch controlling the apico-basal distribution of the GPCR smoothened
Source: eLife. 2022 Sep 9;11:e79843. doi: 10.7554/eLife.79843 (PMC9462849; doi:10.7554/eLife.79843)
Supplement: Figure 2—source data 3. [file elife-79843-fig2-data3.xlsx]

## Sheet: Feuil1
Figure 2- Source Data 3
2E : Relative intensity of Surf SNAP-SMO for control and RAB5CA flies
Summary Statistics (arithmetic from GraphPad Prism 9)
	FA							P							Mann-Whitney test
	Relative intensity apical		Relative intensity lateral		Relative intensity basal			Relative intensity apical		Relative intensity lateral		Relative intensity basal			****	<0.0001
	Ctr	rab5CA	Ctr	rab5CA	Ctr	rab5CA		Ctr	rab5CA	Ctr	rab5CA	Ctr	rab5CA		***	0.0003
Number of values	11	8	11	8	11	8		11	8	11	8	11	8
Mean	0.1998	0.3793	0.7347	0.5765	0.06544	0.04404		0.1931	0.3027	0.7329	0.6339	0.07425	0.06365
Std. Deviation	0.02619	0.07108	0.01906	0.06493	0.009618	0.009617		0.02037	0.06098	0.01386	0.05304	0.0156	0.01402
Lower 95% CI of mean	0.1822	0.3199	0.7219	0.5222	0.05898	0.036		0.1794	0.2517	0.7236	0.5895	0.06376	0.05193
Upper 95% CI of mean	0.2174	0.4387	0.7475	0.6308	0.0719	0.05208		0.2068	0.3537	0.7422	0.6782	0.08473	0.07537
Source Data											Source Data
	Ctr											Rab5CA
	FA					P						FA					P
Discs	I.D Column	I.D Apical	I.D Basal	I.D Lateral		I.D Column	I.D Apical	I.D Basal	I.D Lateral		Discs	I.D Column	I.D Apical	I.D Basal	I.D Lateral		I.D Column	I.D Apical	I.D Basal	I.D Lateral
1	4495745	934844	284868	3276033		4806520	844408	352697	3609415		1	3052504	1228823	122103	1705085		2772075	852005	172835	1747235
2	5600819	1250824	306971	4043024		6766086	1333736	412634	5019716		2	1561341	453945	78002	1027168		1589409	344446	102847	1142800
3	4785212	1190819	252325	3337577		5655777	1279724	336884	4039169		3	3006431	1065993	97373	1839774		3517935	1076443	169206	2272286
4	6006042	1083243	434937	4487862		5850604	1057586	454577	4338441		4	2429818	1094925	97377	1237516		2376998	872836	152152	1352010
5	7804773	1590177	522396	5692200		8561732	1753134	770221	6053669		5	1685649	540601	100451	1044597		2613543	562271	249094	1802178
6	6391830	1149324	484527	4757979		6576734	1198906	597976	4779852		6	1456780	565986	74615	816179		1908433	559731	120496	1228206
7	5400138	932531	428622	4038985		9290750	1425311	902846	6.96259e+06		7	3187713	1597930	102315	1487468		2910832	1091268	157627	1665543
8	5428892	866520	407756	4154616		8012477	1478374	706484	5827619		8	3203548	1043019	150467	2010062		3821912	1303561	219512	2298839
9	6599111	1470851	366961	4769560		7574960	1574480	490964	5509516
10	4775542	994981	325124	3450335		8743683	1727585	561157	6454941
11	7087373	1350635	394148	5342590		10099181	2161552	503401	7446535
