# Supplementary material for: High hedgehog signaling is transduced by a multikinase-dependent switch controlling the apico-basal distribution of the GPCR smoothened
Source: eLife. 2022 Sep 9;11:e79843. doi: 10.7554/eLife.79843 (PMC9462849; doi:10.7554/eLife.79843)
Supplement: Figure 2—source data 4. [file elife-79843-fig2-data4.xlsx]

## Sheet: Feuil1
Figure 2- Source Data 4
Figure 2F : Relative intensity of Surf SNAP-SMO for control and smurf RNAi flies
Summary Statistics (arithmetic from GraphPad Prism 9)
	FA							P							Mann-Whitney test
	Relative intensity apical		Relative intensity lateral		Relative intensity basal			Relative intensity apical		Relative intensity lateral		Relative intensity basal			NO HH	****	<0.0001
	ctr	smurf RNAi	ctr	smurf RNAi	ctr	smurf RNAi		ctr	smurf RNAi	ctr	smurf RNAi	ctr	smurf RNAi			***	0.0002
Number of values	20	6	20	6	20	6		20	6	20	6	20	6		HH	****	<0.0001
																***	0.0008
Mean	0.19	0.2568	0.744	0.7007	0.06595	0.04293		0.1557	0.2187	0.7599	0.7282	0.08481	0.05309			***	0.0002
Std. Deviation	0.01768	0.02788	0.01591	0.02188	0.01014	0.008473		0.02248	0.02017	0.01497	0.01531	0.01569	0.009661
Lower 95% CI of mean	0.1817	0.2275	0.7365	0.6777	0.0612	0.03404		0.1452	0.1975	0.7529	0.7122	0.07747	0.04296
Upper 95% CI of mean	0.1983	0.286	0.7514	0.7237	0.0707	0.05182		0.1662	0.2398	0.7669	0.7443	0.09216	0.06323
Source Data											Source Data
	ctr											smurf RNAi
	FA					P						FA					P
Discs	I.D Column	I.D Apical	I.D Basal	I.D Lateral		I.D Column	I.D Apical	I.D Basal	I.D Lateral		Discs	I.D Column	I.D Apical	I.D Basal	I.D Lateral		I.D Column	I.D Apical	I.D Basal	I.D Lateral
1	2909697	551971	155287	2202439		3819315	682121	291363	2845831		1	10887544	3126034	428749	7332761		8780572	1725830	526360	6528382
2	3104888	591788	175232	2333220		4762619	762245	365833	3637191		2	7576586	1691530	394086	5501109		9598379	2068244	432563	7097572
3	2497450	473703	168929	1858828		3543296	588809	237555	2716932		3	9637543	2812187	327874	6506515		9067166	2194398	481613	6391155
4	2145148	389115	126826	1629207		2912337	575041	205092	2137861		4	12320616	3163292	407520	8749804		10596042	2359825	480634	7755583
5	1903459	365503	110911	1427045		2673165	394879	214634	2063652		5	11985364	2972863	593859	8418642		13110390	3142222	606011	9362157
6	3161722	466922	246978	2444627		4310572	527856	426016	3356700		6	7482737	1747597	370640	5364500		7997669	1564520	550641	5882508
7	2601007	517887	145569	1937551		3603269	653212	234799	2721823
8	3382815	655806	218731	2508278		4275456	697465	293811	3291482
9	3283425	741332	175537	2366556		4946337	875262	328089	3742986
10	3207399	565643	224030	2417726		4253898	655472	416749	3181677
11	2891589	585858	247142	2058589		3686284	547124	414004	2725156
12	2150882	448216	150621	1552045		3352703	521708	322895	2508100
13	2657962	472162	162021	2023779		4053059	589565	275971	3181018
14	2247770	495614	133845	1618311		2750828	400449	228262	2122117
15	2824178	542973	199769	2081436		4563417	722297	397953	3443167
16	2643058	530119	169169	1947911		5117872	1001066	374318	3742488
17	2973877	523945	191703	2254575		4502583	611309	432728	3460893
18	3174367	564316	218393	2391658		4882118	666518	474585	3751250
19	2755354	464107	253396	2037851		3718830	450415	409119	2859296
20	2179096	413091	144151	1620420		3277407	404056	344339	2529012
