# Supplementary material for: High hedgehog signaling is transduced by a multikinase-dependent switch controlling the apico-basal distribution of the GPCR smoothened
Source: eLife. 2022 Sep 9;11:e79843. doi: 10.7554/eLife.79843 (PMC9462849; doi:10.7554/eLife.79843)
Supplement: Figure 3—source data 1. [file elife-79843-fig3-data1.xlsx]

## Sheet: Feuil1
Figure 3- Source Data 1
Figure 3C: Mean intensity of Surf SNAP-SMO at T0 and at T15'
Summary Statistics (arithmetic from GraphPad Prism 9)
	FA									P									Mann-Whitney test
	Mean Column		Mean Apical		Mean Intermediate		Mean Basal			Mean Column		Mean Apical		Mean Intermediate		Mean Basal			****	<0.0001
	T0	T15	T0	T15	T0	T15	T0	T15		T0	T15	T0	T15	T0	T15	T0	T15
Number of values	20	23	20	23	20	23	20	23		20	23	20	23	20	23	20	23
Mean	54	29.8	68.56	35.83	53.51	29.3	35.78	24.4		78.16	58.64	81.37	48.18	79.1	60.39	66.13	61.11
Std. Deviation	10.28	5.336	15.69	11.9	9.87	5.178	10.07	4.273		13.6	6.857	19.71	10.59	13.44	6.958	17.02	11.88
Lower 95% CI of mean	49.19	27.49	61.21	30.68	48.9	27.07	31.07	22.55		71.79	55.67	72.14	43.6	72.8	57.38	58.17	55.97
Upper 95% CI of mean	58.81	32.11	75.9	40.97	58.13	31.54	40.49	26.24		84.52	61.6	90.59	52.76	85.39	63.4	74.1	66.25
Source Data											Source Data
	T0											T15
	FA					P						FA					P
Discs	Mean Column	Mean Apical	Mean Basal	Mean Intermediate		Mean Column	Mean Apical	Mean Basal	Mean Intermediate		Discs	Mean Column	Mean Apical	Mean Basal	Mean Intermediate		Mean Column	Mean Apical	Mean Basal	Mean Intermediate
1	60.9157	76.8548	32.4325	61.5275		77.1953	92.0541	59.4376	76.5749		1	30.942	35.4555	32.3007	29.8505		63.1626	51.9368	81.1527	63.0593
2	61.4805	78.6534	34.9346	61.6471		93.8817	99.7964	71.3125	95.5245		2	29.7641	32.965	27.4482	29.4337		64.4891	53.9015	64.4535	66.6308
3	50.1315	62.9589	33.678	49.7119		71.948	79.4614	48.4608	73.5578		3	29.8519	33.858	25.7644	29.5904		48.7284	38.3551	57.373	49.6475
4	43.5581	52.5121	25.8723	44.1089		58.4595	76.4276	40.8876	57.1743		4	29.5288	29.4711	28.7848	29.5787		70.0761	47.7992	89.8605	71.8821
5	42.9229	55.2787	24.9462	42.8697		57.3321	56.7844	45.9208	58.9649		5	36.3381	44.4232	28.3348	35.797		63.879	57.5692	62.5665	65.3126
6	58.3882	57.6874	45.1349	60.2362		82.3792	67.106	81.2387	85.5952		6	29.8219	25.1103	24.1806	31.4701		57.3835	41.6274	62.9016	59.7655
7	51.0422	67.804	28.376	50.7345		73.5061	88.1528	47.8986	73.9184		7	30.3834	38.8767	27.0202	29.1332		56.6503	57.3546	59.3046	56.1743
8	70.8206	91.3124	45.6832	70.0715		85.6256	92.6987	58.5748	87.7588		8	41.5512	51.8654	26.8469	41.4105		63.8685	54.5928	45.2016	68.1967
9	68.4132	103.221	36.6619	65.6939		101.613	119.965	66.9296	102.604		9	25.93	35.7719	21.3706	24.5611		57.7762	61.529	52.1246	57.7736
10	63.654	75.1785	44.6631	63.8799		87.1843	89.8399	85.0161	86.9453		10	26.8498	23.6787	19.5856	28.4396		55.1532	37.3835	66.5767	57.1658
11	77.0967	104.88	65.6943	73.1085		98.5848	97.9456	110.049	97.1743		11	33.2481	37.6319	23.9125	33.6337		53.6878	42.0103	47.8745	56.7885
12	50.7188	70.2093	35.7091	48.7972		77.5981	80.2875	74.5372	77.4679		12	36.2669	61.4311	23.4908	32.892		51.2669	44.335	46.1336	53.3398
13	51.5829	60.9084	31.583	52.3671		80.2554	78.3579	55.0181	84.0472		13	31.8806	50.2896	18.135	30.0259		56.674	48.7341	51.1016	58.9921
14	42.0411	62.107	24.9804	40.3287		53.7418	52.4285	44.4955	55.2376		14	34.1997	57.0664	16.7528	31.9348		73.0229	68.9818	70.1685	74.2051
15	47.7331	61.0631	33.6992	46.9363		81.5274	85.6208	71.2411	82.074		15	32.6484	45.5109	20.7509	31.6503		58.7534	62.2833	46.8091	59.6338
16	48.5036	64.5856	30.9154	47.5959		91.0621	118.666	67.01	88.7266		16	36.6101	43.0633	24.8009	36.8829		67.8411	61.2089	57.0475	70.6127
17	48.0417	56.7408	31.1408	48.5921		78.2106	70.5574	74.4286	80.1021		17	30.0425	34.3147	23.5093	30.009		61.5996	51.3033	55.0049	64.5486
18	50.8126	60.3676	34.8314	51.0449		82.8348	74.957	80.0582	84.8085		18	21.4465	28.1828	20.0632	20.2851		56.1731	46.1872	69.6304	56.2282
19	53.4729	59.8693	49.3949	52.7312		72.8154	58.9703	79.7503	74.6475		19	27.3823	32.2998	30.6372	25.9702		63.9256	47.9212	76.0632	65.4977
20	38.6159	48.9676	25.2896	38.3132		57.3836	47.258	60.4104	59.0008		20	23.7685	19.1591	25.9725	24.4005		50.3554	29.777	65.5979	52.4324
											21	24.1129	21.0484	30.7827	23.8452		55.3611	34.1169	73.9374	57.1467
											22	20.0022	20.2159	19.561	19.9885		51.7104	35.2785	54.0853	54.6918
											23	22.8776	22.3432	21.1295	23.2154		47.113	33.9879	50.5643	49.2779
