# Supplementary material for: High hedgehog signaling is transduced by a multikinase-dependent switch controlling the apico-basal distribution of the GPCR smoothened
Source: eLife. 2022 Sep 9;11:e79843. doi: 10.7554/eLife.79843 (PMC9462849; doi:10.7554/eLife.79843)
Supplement: Figure 3—source data 2. [file elife-79843-fig3-data2.xlsx]

## Sheet: Feuil1
Figure 3- Source Data 2
Figure 3D : Relative intensity of Surf SNAP-SMO at T0 et T15'
Summary Statistics (arithmetic from GraphPad Prism 9)
	FA							P							Mann-Whitney test
	Relative intensity apical		Relative intensity Intermediate		Relative intensity basal			Relative intensity apical		Relative intensity Intermediate		Relative intensity basal			NO HH	***	0.0005
	T0	T15	T0	T15	T0	T15		T0	T15	T0	T15	T0	T15		HH	****	<0.0001
Number of values	20	23	20	23	20	23		20	23	20	23	20	23			**	0.0085
																***	0.001
Mean	0.19	0.1774	0.744	0.7386	0.06595	0.08416		0.1557	0.1226	0.7599	0.7732	0.08481	0.1045
Std. Deviation	0.01768	0.03722	0.01591	0.02842	0.01014	0.01919		0.02248	0.01955	0.01497	0.01501	0.01569	0.01806
Lower 95% CI of mean	0.1817	0.1613	0.7365	0.7263	0.0612	0.07586		0.1452	0.1142	0.7529	0.7668	0.07747	0.09666
Upper 95% CI of mean	0.1983	0.1935	0.7514	0.7508	0.0707	0.09246		0.1662	0.1311	0.7669	0.7797	0.09216	0.1123
Source Data											Source Data
T0											T15
	FA					P						FA					P
Discs	I.D Column	I.D Apical	I.D Basal	I.D Intermediate		I.D Column	I.D Apical	I.D Basal	I.D Intermediate		Discs	I.D Column	I.D Apical	I.D Basal	I.D Intermediate		I.D Column	I.D Apical	I.D Basal	I.D Intermediate
1	2909697	551971	155287	2202439		3819315	682121	291363	2845831		1	1375682	238474	143609	997068		2779405	343406	360805	2084742
2	3104888	591788	175232	2333220		4762619	762245	365833	3637191		2	1496362	248029	137680	1110653		3212719	405555	323299	2491458
3	2497450	473703	168929	1858828		3543296	588809	237555	2716932		3	1402083	239308	120423	1042352		2338670	275466	274702	1788502
4	2145148	389115	126826	1629207		2912337	575041	205092	2137861		4	1430671	215021	141103	1075659		3371222	343294	430252	2597676
5	1903459	365503	110911	1427045		2673165	394879	214634	2063652		5	1686016	308919	132437	1244660		2971138	400336	292436	2278366
6	3161722	466922	246978	2444627		4310572	527856	426016	3356700		6	1478868	186067	121290	1169556		2767146	298968	301173	2159805
7	2601007	517887	145569	1937551		3603269	653212	234799	2721823		7	1593307	305804	141694	1145809		3009490	457690	317754	2241356
8	3382815	655806	218731	2508278		4275456	697465	293811	3291482		8	2074734	390235	134664	1553142		3334701	429427	237037	2674403
9	3283425	741332	175537	2366556		4946337	875262	328089	3742986		9	1336123	277304	109631	949188		2990263	476973	267399	2245891
10	3207399	565643	224030	2417726		4253898	655472	416749	3181677		10	1267202	167361	91543	1008298		2691035	272750	326359	2091926
11	2891589	585858	247142	2058589		3686284	547124	414004	2725156		11	1576757	265982	114493	1196282		2576690	301718	229223	2045749
12	2150882	448216	150621	1552045		3352703	521708	322895	2508100		12	1835687	469211	117830	1248646		2594924	338631	231406	2024887
13	2657962	472162	162021	2023779		4053059	589565	275971	3181018		13	1595495	378379	90965	1126151		2804002	361120	250500	2192382
14	2247770	495614	133845	1618311		2750828	400449	228262	2122117		14	1688168	422862	82122	1183184		3612880	511155	343966	2757759
15	2824178	542973	199769	2081436		4563417	722297	397953	3443167		15	1842351	383930	118280	1338618		3154707	504121	250803	2399783
16	2643058	530119	169169	1947911		5117872	1001066	374318	3742488		16	1974088	348554	132883	1492651		3333307	453558	279647	2600102
17	2973877	523945	191703	2254575		4502583	611309	432728	3460893		17	1661048	285567	131323	1245254		3307531	415249	294716	2597566
18	3174367	564316	218393	2391658		4882118	666518	474585	3751250		18	1092872	215260	102924	774688		2849661	352778	357204	2140946
19	2755354	464107	253396	2037851		3718830	450415	409119	2859296		19	1304821	231977	146691	929629		2929584	327781	346848	2254955
20	2179096	413091	144151	1620420		3277407	404056	344339	2529012		20	1224743	148521	133239	942983		2531567	224042	329039	1978486
											21	1217752	158368	154406	902494		2739048	252806	362441	2123801
											22	991911	149800	98118	742852		2546636	261414	265126	2020096
											23	1100596	160469	101168	838959		2255772	244101	242102	1769569
