# Supplementary material for: High hedgehog signaling is transduced by a multikinase-dependent switch controlling the apico-basal distribution of the GPCR smoothened
Source: eLife. 2022 Sep 9;11:e79843. doi: 10.7554/eLife.79843 (PMC9462849; doi:10.7554/eLife.79843)
Supplement: Figure 4—source data 1. [file elife-79843-fig4-data1.xlsx]

## Sheet: Feuil1
Figure 4- Source Data 1
Figure 4E-E": Relative intensity of Surf SNAP-SMO for different SMO mutants
Summary Statistics (arithmetic from GraphPad Prism 9)
	Relative intensity apical						Relative intensity lateral						Relative intensity basal						Mann-Whitney test
	WT		PKA-SD	PKA-SD FU-SA	PKA-SD FU-SD		WT		PKA-SD	PKA-SD FU-SA	PKA-SD FU-SD		WT		PKA-SD	PKA-SD FU-SA	PKA-SD FU-SD		E	Apical	****	<0.0001
	FA	P	FA	FA	FA		FA	P	FA	FA	FA		FA	P	FA	FA	FA				**	0.0025
Number of values	21	21	10	15	18		21	21	10	15	18		21	21	10	15	18		E'	lateral	**	0.0033
																					****	<0.0001
Mean	0.2298	0.1883	0.09342	0.1728	0.07875		0.7118	0.7335	0.7979	0.7517	0.7587		0.05871	0.07815	0.1093	0.07545	0.1626		E"	Basal	***	0.0002
Std. Deviation	0.02353	0.03209	0.009161	0.03698	0.01581		0.01921	0.02808	0.007853	0.02975	0.02968		0.008835	0.01129	0.01335	0.01397	0.04135				****	<0.0001
Lower 95% CI of mean	0.2191	0.1737	0.08686	0.1523	0.07089		0.703	0.7207	0.7923	0.7353	0.744		0.05469	0.07302	0.09973	0.06771	0.142		For the comparison between WT -HH with WT +HH, the Wilcoxon test was used
Upper 95% CI of mean	0.2405	0.2029	0.09997	0.1933	0.08661		0.7205	0.7463	0.8035	0.7682	0.7735		0.06274	0.08329	0.1188	0.08319	0.1832
Source Data											Source Data						Source Data						Source Data
	WT											PKA-SD						PKA-SD FU-SA						PKA-SD FU-SD
	FA					P						FA						FA						FA
Discs	I.D Column	I.D Apical	I.D Basal	I.D Lateral		I.D Column	I.D Apical	I.D Basal	I.D Lateral		Discs	I.D Column	I.D Apical	I.D Basal	I.D Lateral		Discs	I.D Column	I.D Apical	I.D Basal	I.D Lateral		Discs	I.D Column	I.D Apical	I.D Basal	I.D Lateral
1	4562286	1104611	259967	3197708		5987506	1028248	545648	4413610		1	5625922	510383	656573	4458966		1	5168820	1067464	364556	3736800		1	4792312	437924	578818	3775570
2	3038502	762976	170082	2105444		5449569	1267476	418903	3763190		2	6135303	572226	613840	4949237		2	12424341	2736679	769198	8918464		2	4564085	398149	613801	3555488
3	2903557	742938	156752	2003867		4292686	824855	318793	3151391		3	7925240	726757	868301	6330182		3	11697556	2072269	683876	8927154		3	5370533	358477	847573	4164483
4	2962043	721165	142203	2099999		5111697	1149593	336825	3633086		4	6701593	616170	858126	5227297		4	13663678	2119385	988279	10556014		4	9389836	1098560	975835	7296635
5	2968030	698779	152817	2120589		4650430	999754	344119	3306557		5	6774027	575900	735439	5462688		5	5433921	1260536	330691	3842694		5	3438197	278230	458023	2701944
6	3023752	762607	146970	2119164		4548021	756075	376512	3415434		6	6446838	530638	811583	5125155		6	5912103	779757	632904	4499442		6	3549759	359933	470691	2729909
7	3457064	827778	233384	2395902		5164905	736192	327726	4100987		7	6769409	672007	730814	5387557		7	7115899	1012587	713440	5395760		7	5300167	313448	1250023	3736696
8	3426287	872225	176602	2382755		5583852	1157632	391353	4034867		8	6048851	677388	510841	4860622		8	6181311	1111234	450096	4619981		8	6639042	400680	1360332	4904380
9	2709370	587552	159259	1962559		6925510	1814169	489836	4621505		9	6.52663e+06	553354	754586	5218695		9	10216301	1793953	649414	7789112		9	7124750	341590	1851397	4931763
10	2424703	565375	120881	1742136		3809928	710280	244223	2849980		10	7853669	810321	753856	6.28949e+06		10	5502157	759864	471117	4271176		10	2772928	219873	356368	2182711
11	2847815	600606	186797	2060412		4995464	1030518	416347	3540258								11	5930651	1270362	462324	4197965		11	4099735	323425	697984	3078326
12	3345206	859301	186672	2299233		5222034	1023554	418678	3779802								12	4474083	664082	326905	3476109		12	3528344	309132	557431	2661781
13	2784111	722222	174803	1884097		4874455	905122	418336	3550997								13	6712291	702803	745044	5264444		13	2895308	218447	387565	2289296
14	2703018	626781	166294	1909943		4485973	812348	369511	3297937								14	6191285	612217	878823	4700245		14	4560279	359595	938388	3262296
15	1964810	416604	93399	1452128		3545682	769890	218525	2557267								15	6926027	887908	581906	5456213		15	6.66432e+06	556009	1071890	5014672
16	3160330	664233	184376	2311721		5793574	898000	502414	4393160								16	7391688	1585406	499435	5306847		16	3497652	242667	631966	2623019
17	3117345	629928	182649	2304768		5588275	920308	374330	4293637								17	6509569	832436	493035	5184098		17	3811424	283287	540739	2987398
18	2817252	628459	181403	2007390		4835917	823055	404819	3608043														18	4668062	364511	763610	3556661
19	2477852	530554	163171	1788714		4589271	821197	381530	3396109
20	2961642	639508	189660	2132474		4595798	812497	390088	3393213
21	2699853	444317	231718	2023818		4701735	572080	513233	3616422
