# Supplementary material for: High hedgehog signaling is transduced by a multikinase-dependent switch controlling the apico-basal distribution of the GPCR smoothened
Source: eLife. 2022 Sep 9;11:e79843. doi: 10.7554/eLife.79843 (PMC9462849; doi:10.7554/eLife.79843)
Supplement: Figure 5—figure supplement 2—source data 1. [file elife-79843-fig5-figsupp2-data1.xlsx]

## Sheet: Feuil1
Figure 5-figure supplement 2 source data 1
2D-D" Relative and mean intensity of endogenous SMO in T48 GFP-FU flies
Summary Statistics (arithmetic from GraphPad Prism 9)
	FA									P									FA
	Mean Column		Mean Apical		Mean Lateral		Mean Basal			Mean Column		Mean Apical		Mean Lateral		Mean Basal			Relative intensity apical		Relative intensity lateral		Relative intensity basal
	V	D	V	D	V	D	V	D		V	D	V	D	V	D	V	D		V	D	V	D	V	D
Number of values	9	9	9	9	9	9	9	9		9	9	9	9	9	9	9	9		9	9	9	9	9	9
Mean	232.4	448.4	210.3	377.3	236.6	455.7	234.1	499.7		232.4	448.4	210.3	377.3	236.6	455.7	234.1	499.7		0.1346	0.1261	0.7628	0.7606	0.1026	0.1136
Std. Deviation	61.22	113.6	73.23	103.6	63.1	119.6	45.41	103.5		61.22	113.6	73.23	103.6	63.1	119.6	45.41	103.5		0.01865	0.01067	0.01722	0.01232	0.01321	0.01253
Lower 95% CI of mean	185.3	361.1	154	297.7	188.1	363.8	199.2	420.2		349.4	456.9	264.9	370.3	358.8	456.8	382.8	566.1		0.1203	0.1179	0.7496	0.7512	0.09246	0.104
Upper 95% CI of mean	279.4	535.7	266.6	457	285.1	547.7	269	579.3		548.3	759.3	422.8	617.8	567.8	763.7	616.3	955.7		0.1489	0.1343	0.7761	0.7701	0.1128	0.1233
Source Data							Source Data							Source Data							D, D'
		FA							P							FA					Paired T-test
		Mean Column	Mean Apical	Mean Lateral	Mean Basal				Mean Column	Mean Apical	Mean Lateral	Mean Basal				I.D Column	I.D Apical	I.D Basal	I.D Lateral		FA	****	<0.0001
D1	Ventral	181.369	184.337	189.301	179.863		D1	Ventral	348.144	262.687	389.194	359.688		D1	Ventral	8477205	1302895	884795	6315360
	Dorsal	334.907	272.801	444.999	332.129			Dorsal	458.056	423.812	580.747	449.056			Dorsal	16149908	1959260	2130653	12002486		D"
D2	Ventral	182.415	174.121	187.462	183.404		D2	Ventral	375.615	302.924	446.082	381.12		D2	Ventral	9545046	1369632	983050	7192364		Wilcoxon
	Dorsal	352.538	329.993	383.409	352.303			Dorsal	444.228	337.544	534.521	453.581			Dorsal	17884271	2520489	1966886	13414299		*	0.0195
D3	Ventral	152.932	133.989	173.461	154		D3	Ventral	266.909	221.901	185.022	286.753		D3	Ventral	11018420	1451105	1245794	8321521
	Dorsal	271.399	237.533	323.571	271.252			Dorsal	345.495	277.877	459.689	343.931			Dorsal	19553726	2572486	2323888	1.46574e+07
D4	Ventral	190.829	137.451	248.207	193.966		D4	Ventral	353.564	274.742	485.831	351.983		D4	Ventral	11399336	1237883	1471372	8690081
	Dorsal	413.289	316.77	503.209	421.177			Dorsal	503.549	435.324	694.219	491.65			Dorsal	23416119	2708386	2868290	17909276
D5	Ventral	286.639	229.171	243.056	303.846		D5	Ventral	553.082	414.323	523.093	584.805		D5	Ventral	14181757	1698157	1191461	11292139
	Dorsal	546.237	441.776	513.174	571.491			Dorsal	764.009	616.714	815.233	786.704			Dorsal	25406575	3072109	2398576	19935890
D6	Ventral	249.703	195.868	267.035	257.99		D6	Ventral	488.878	362.258	628.135	496.108		D6	Ventral	13179798	1540698	1400333	10205570
	Dorsal	490.289	430.526	520.198	498.204			Dorsal	692.211	596.63	851.049	689.036			Dorsal	23586846	3092040	2490710	18004096
D7	Ventral	306.878	308.457	276.558	310.614		D7	Ventral	576.763	445.668	552.429	606.822		D7	Ventral	13608799	2039515	1229577	10339707
	Dorsal	551.082	487.453	557.901	563.494			Dorsal	688.761	535.817	716.977	714.405			Dorsal	23684419	3167467	2416828	18179457
D8	Ventral	219.591	182.137	215.875	227.597		D8	Ventral	413.027	275.782	575.021	419.036		D8	Ventral	11815767	1474213	1156657	9184897
	Dorsal	464.849	333.127	591.006	474.057			Dorsal	591.572	420.27	880.006	586.837			Dorsal	23104835	2468470	2964485	17671880
D9	Ventral	321.171	347.393	305.799	317.964		D9	Ventral	663.725	534.067	711.347	683.294		D9	Ventral	13144228	2138550	1255000	9750678
	Dorsal	611.124	546.147	660.196	617.406			Dorsal	985.2	802.245	1315.51	976.98			Dorsal	24801867	3299818	2709444	18792605
